# Supplementary material
Source: HighWire-hosted journal article supplement (http://www.cmaj.ca/highwire/filestream/150458/field_highwire_adjunct_files/0/231300-five-1-at.pdf)
Supplement: 231300-five-1-at.pdf [file 231300-five-1-at.pdf]

Appendix 1. Antibiotic dosing recommendations for hemodialysis associated infection and peritoneal dialysis-catheter peritonitis # (5)

| Pathogens                                          | Antibiotic*                                                                                                                                                                                                                                                                                                                                                                                                                 | Comments <sup>+</sup>                                                                                                                                   |
|----------------------------------------------------|-----------------------------------------------------------------------------------------------------------------------------------------------------------------------------------------------------------------------------------------------------------------------------------------------------------------------------------------------------------------------------------------------------------------------------|---------------------------------------------------------------------------------------------------------------------------------------------------------|
| Gram positive, including <i>S. aureus</i> and CoNS | <p>Hemodialysis associated infection:</p> <ul style="list-style-type: none"> <li>• Cefazolin 2 g IV post-HD, or</li> <li>• Vancomycin IV</li> </ul> <p>PD-catheter peritonitis (14 to 21-day treatment duration):</p> <ul style="list-style-type: none"> <li>• Cefazolin 15 to 20 mg/kg IP daily, or</li> <li>• Vancomycin 15 to 30 mg/kg IP, repeat doses dependent on serum levels</li> </ul>                             | Vancomycin IV doses are adjusted based on pre-dialysis vancomycin serum concentrations                                                                  |
| Gram negative, including Pseudomonas               | <p>Hemodialysis associated infection:</p> <ul style="list-style-type: none"> <li>• Ceftazidime 1 g IV post-HD, or</li> <li>• Gentamicin or tobramycin 1 mg/kg IV at end of HD session (Max 100 mg)</li> </ul> <p>PD-catheter peritonitis (14 to 21-day treatment duration):</p> <ul style="list-style-type: none"> <li>• Ceftazidime 1500 mg IP daily, or</li> <li>• Gentamicin or tobramycin 0.6 mg/kg IP daily</li> </ul> | Early switch to a non-aminoglycoside (as guided by cultures) is recommended to minimize risk of ototoxicity.                                            |
| Fungal prophylaxis                                 | Fluconazole 200 mg PO every other day, or Nystatin 500,000 units PO QID                                                                                                                                                                                                                                                                                                                                                     | In PD-catheter peritonitis, empiric systemic antifungal prophylaxis used throughout duration of antibacterials reduces incidence of fungal peritonitis. |

# Refractory PD-catheter peritonitis is characterized by failure of the PD effluent to clear within 5-days of appropriate antibiotics, whereas recurrent PD-catheter peritonitis is a peritonitis episode occurring within 4-weeks of completing therapy for a prior episode

\* Dosing of IP antibacterials (at listed doses) requires dwell time of at least 6 hours

<sup>+</sup> ID consultation can optimize type and duration of therapy based on microbiological cultures and plan for catheter salvage
